# Supplementary material for: Determinants of Changes in Women’s and Men’s Physical Activity and Sedentary Behavior across the Transition to Parenthood: A Focus Group Study
Source: MDPI journal article supplement (doi:10.3390/ijerph19042421), 2022-02-19
Supplement: s1 [file s1]

**Table S1:** Categorization (leaf-category, stem-category and main level) of determinants of changes in PA behavior during pregnancy and postpartum

| Determinant                            | Leaf-category                           | Stem-category | Main level | Determinant                                        | Leaf-category                      | Stem-category | Main level |
|----------------------------------------|-----------------------------------------|---------------|------------|----------------------------------------------------|------------------------------------|---------------|------------|
| <b>DURING PREGNANCY</b>                |                                         |               |            | <b>POSTPARTUM</b>                                  |                                    |               |            |
| <b>Habits</b>                          | PA habits                               | Psychological | Individual |                                                    |                                    |               |            |
| <b>Health consciousness</b>            | Health cognitions                       | Psychological | Individual |                                                    |                                    |               |            |
| Fit for delivery motivation            | Health cognitions                       | Psychological | Individual |                                                    |                                    |               |            |
| Healthiness                            | Health cognitions                       | Psychological | Individual |                                                    |                                    |               |            |
| Wellbeing                              | Health cognitions                       | Psychological | Individual |                                                    |                                    |               |            |
| <b>Mood and emotions</b>               | Mood and emotions                       | Psychological | Individual |                                                    |                                    |               |            |
| Body image                             | Weight control cognitions and behaviors | Psychological | Individual |                                                    |                                    |               |            |
| Mental tiredness                       | Mood and emotions                       | Psychological | Individual |                                                    |                                    |               |            |
| Stress                                 | Mood and emotions                       | Psychological | Individual |                                                    |                                    |               |            |
| <b>PA knowledge</b>                    | PA knowledge, skills and abilities      | Psychological | Individual | <b>PA knowledge</b>                                | PA knowledge, skills and abilities | Psychological | Individual |
|                                        |                                         |               |            | <b>Parenthood perceptions and responsibilities</b> | Personality                        | Psychological | Individual |
|                                        |                                         |               |            | Barriers to ask for help                           | Personality                        | Psychological | Individual |
|                                        |                                         |               |            | Barriers to leave child                            | Personality                        | Psychological | Individual |
|                                        |                                         |               |            | Barriers to self-care                              | Personality                        | Psychological | Individual |
|                                        |                                         |               |            | Worries and uncertainties about care for baby      | Personality                        | Psychological | Individual |
| <b>Self-licensing (pregnancy card)</b> | Self-regulation                         | Psychological | Individual | <b>Self-licensing</b>                              | Self-regulation                    | Psychological | Individual |
| <b>Self-regulation</b>                 | Self-regulation                         | Psychological | Individual | <b>Self-regulation</b>                             | Self-regulation                    | Psychological | Individual |
| Self-control                           | Self-regulation                         | Psychological | Individual | Habituality of physical activity                   | PA habits                          | Psychological | Individual |
| Self-efficacy                          | Personality                             | Psychological | Individual | Planning                                           | Self-regulation                    | Psychological | Individual |
| Self-regulation                        | Self-regulation                         | Psychological | Individual | Self-control                                       | Self-regulation                    | Psychological | Individual |
| Weight control                         | Weight control cognitions and behaviors | Psychological | Individual | Self-regulation                                    | Self-regulation                    | Psychological | Individual |

|                                              |                                  |               |               |                                              |                                         |               |               |
|----------------------------------------------|----------------------------------|---------------|---------------|----------------------------------------------|-----------------------------------------|---------------|---------------|
|                                              |                                  |               |               | Weight control                               | Weight control cognitions and behaviors | Psychological | Individual    |
| <b>Worries and safety concerns</b>           | Worries and concerns             | Psychological | Individual    | <b>Worries and safety concerns</b>           | Worries and concerns                    | Psychological | Individual    |
| <b>Other priorities</b>                      | Situational and time constraints | Situational   | Individual    | <b>Other priorities</b>                      | Situational and time constraints        | Situational   | Individual    |
| <b>Practical and situational constraints</b> | Situational and time constraints | Situational   | Individual    | <b>Practical and situational constraints</b> | Situational and time constraints        | Situational   | Individual    |
| No suitable sport clothes                    | Situational and time constraints | Situational   | Individual    | Practical issues                             | Situational and time constraints        | Situational   | Individual    |
| Other situational constraints                | Situational and time constraints | Situational   | Individual    | Organizational issues                        | Situational and time constraints        | Situational   | Individual    |
| <b>Time constraints and opportunities</b>    | Situational and time constraints | Situational   | Individual    | <b>Time constraints and opportunities</b>    | Situational and time constraints        | Situational   | Individual    |
| Time constraints                             | Situational and time constraints | Situational   | Individual    |                                              |                                         |               |               |
| Time opportunities                           | Time opportunities               | Situational   | Individual    |                                              |                                         |               |               |
| <b>Physiology</b>                            | Physiology                       | Biological    | Individual    | <b>Physiology and physical health</b>        | Physiology                              | Biological    | Individual    |
| Discomfort                                   | Physiology                       | Biological    | Individual    | Recovery after pregnancy/delivery            | Physiology                              | Biological    | Individual    |
| Fatigue                                      | Physiology                       | Biological    | Individual    | Fatigue                                      | Physiology                              | Biological    | Individual    |
| Physiological changes                        | Physiology                       | Biological    | Individual    | Physiological changes                        | Physiology                              | Biological    | Individual    |
| (Perceived) physical restrictions            | Physiology                       | Biological    | Individual    |                                              |                                         |               |               |
| <b>Social influence</b>                      | Social influence                 | Social        | Interpersonal | <b>Social influence</b>                      | Social influence                        | Social        | Interpersonal |
| Advice                                       | Social influence                 | Social        | Interpersonal | Influence of male partner                    | Social influence                        | Social        | Interpersonal |
| Lack of other people's knowledge             | Social influence                 | Social        | Interpersonal |                                              |                                         |               |               |
| Imposed physical restrictions                | Social influence                 | Social        | Interpersonal | Influence of female partner                  | Social influence                        | Social        | Interpersonal |
| Influence of female partner                  | Social influence                 | Social        | Interpersonal | Professional influence                       | Social influence                        | Social        | Interpersonal |
| Professional influence                       | Social influence                 | Social        | Interpersonal | Social activities                            | Social influence                        | Social        | Interpersonal |
| Social discouragement                        | Social influence                 | Social        | Interpersonal |                                              |                                         |               |               |
| Social support                               | Social influence                 | Social        | Interpersonal |                                              |                                         |               |               |
|                                              |                                  |               |               | <b>Influence of baby</b>                     | Social influence                        | Social        | Interpersonal |
|                                              |                                  |               |               | Adaptation to the rhythm of baby             | Social influence                        | Social        | Interpersonal |
|                                              |                                  |               |               | Baby becomes priority                        | Social influence                        | Social        | Interpersonal |

|                                     |                                               |            |             |                                       |                          |            |               |
|-------------------------------------|-----------------------------------------------|------------|-------------|---------------------------------------|--------------------------|------------|---------------|
|                                     |                                               |            |             | Care for baby                         | Social influence         | Social     | Interpersonal |
|                                     |                                               |            |             | Other activities because of baby      | Social influence         | Social     | Interpersonal |
|                                     |                                               |            |             | Practical organization around baby    | Social influence         | Social     | Interpersonal |
|                                     |                                               |            |             | Practical constraints because of baby | Social influence         | Social     | Interpersonal |
|                                     |                                               |            |             | Role model                            | Social influence         | Social     | Interpersonal |
| <b>Environment PA opportunities</b> | Environment PA availability and accessibility | Meso/Macro | Environment |                                       |                          |            |               |
| <b>Product price</b>                | Market prices                                 | Meso/Macro | Environment | <b>Product price</b>                  | Market prices            | Meso/Macro | Environment   |
| <b>Pregnancy leave regulations</b>  | Governmental regulations                      | Government | Policy      | <b>Maternity leave regulations</b>    | Governmental regulations | Government | Policy        |

PA: Physical activity

**Table S2:** Categorization (leaf-category, stem-category and main level) of determinants of changes in SB during pregnancy and postpartum

| Determinant                            | Leaf-category                    | Stem-category | Main level    | Determinant                        | Leaf-category                    | Stem-category | Main level    |
|----------------------------------------|----------------------------------|---------------|---------------|------------------------------------|----------------------------------|---------------|---------------|
| <b>DURING PREGNANCY</b>                |                                  |               |               | <b>POSTPARTUM</b>                  |                                  |               |               |
| <b>Self-licensing (pregnancy card)</b> | Self-regulation                  | Psychological | Individual    |                                    |                                  |               |               |
| <b>Self-regulation</b>                 | Self-regulation                  | Psychological | Individual    | <b>Self-regulation</b>             | Self-regulation                  | Psychological | Individual    |
|                                        |                                  |               |               | Planning                           | Self-regulation                  | Psychological | Individual    |
| <b>Change in activities</b>            | Situational and time constraints | Situational   | Individual    | <b>Change in activities</b>        | Situational and time constraints | Situational   | Individual    |
| Fewer out-of-home activities           | Situational and time constraints | Situational   | Individual    | Fewer out-of-home activities       | Situational and time constraints | Situational   | Individual    |
| Preparing child room                   | Situational and time constraints | Situational   | Individual    | More household activities          | Situational and time constraints | Situational   | Individual    |
|                                        |                                  |               |               | <b>Time constraints</b>            | Situational and time constraints | Situational   | Individual    |
|                                        |                                  |               |               |                                    |                                  |               |               |
| <b>Work situational</b>                | Situational and time constraints | Situational   | Individual    | <b>Work situational</b>            | Situational and time constraints | Situational   | Individual    |
| <b>Physiology and physical health</b>  | Physiology                       | Biological    | Individual    | <b>Physical health</b>             | Physiology                       | Biological    | Individual    |
| Discomfort                             | Physiology                       | Biological    | Individual    |                                    |                                  |               |               |
| Fatigue                                | Physiology                       | Biological    | Individual    |                                    |                                  |               |               |
| <b>Social influence</b>                | Social influence                 | Social        | Interpersonal |                                    |                                  |               |               |
| Support of male partner                | Social influence                 | Social        | Interpersonal |                                    |                                  |               |               |
| Influence of female partner            | Social influence                 | Social        | Interpersonal |                                    |                                  |               |               |
| Professional support                   | Social influence                 | Social        | Interpersonal |                                    |                                  |               |               |
| External support                       | Social influence                 | Social        | Interpersonal |                                    |                                  |               |               |
|                                        |                                  |               |               | <b>Influence of baby</b>           | Social influence                 | Social        | Interpersonal |
|                                        |                                  |               |               | Adaptation to the rhythm of baby   | Social influence                 | Social        | Interpersonal |
|                                        |                                  |               |               | Care for baby                      | Social influence                 | Social        | Interpersonal |
|                                        |                                  |               |               | Practical organization around baby | Social influence                 | Social        | Interpersonal |

|                                    |                          |            |        |                                    |                          |            |               |
|------------------------------------|--------------------------|------------|--------|------------------------------------|--------------------------|------------|---------------|
|                                    |                          |            |        | Feeding baby                       | Social influence         | Social     | Interpersonal |
| <b>Pregnancy leave regulations</b> | Governmental regulations | Government | Policy | <b>Maternity leave regulations</b> | Governmental regulations | Government | Policy        |
